# Supplementary material
Source: publisher figshare collection journal article supplement (https://tandf.figshare.com/ndownloader/files/22732154)
Supplement: Supplementary file 1 [file 22732154]

**Appendix A**

**Cover features and new Associate Editors of the *Environmental Technology***

Peng Du, Xing Li, Yanling Yang, Xiaoyan Fan, Xiaobo Fang, Zhiwei Zhou*

Corresponding author, Tel.: +86 10 67391726; Beijing University of Technology, No.100 Xi Da Wang Road, Chao Yang District, Beijing 100124, P. R. China. E-mai address: hubeizhouzhiwei@163.com.

**Appendix A, figures**

**Figure A1.** Effect of addition ratio (first and second dose of the same coagulant), totaling 0.10 mM of either PACI or AS, on residual turbidity at pH=7.5. The time interval between the two doses was 2.5 min. Residual turbidity was determined while omitting flock breakage at 300 rpm.

**Figure A2.** Effect of solution pH on zeta potential with a single addition of the indicated dose of PACl or AS. The zeta potentials were measured 1 min after the addition.

**Figure A3.** Effect of solution pH on residual aluminum of the two coagulants added in the two addition modes. For two-stage addition, 0.10 mM PACl or AS was divided into two doses at a ratio of 3:7, and the addition interval was 2.5 min.

**Figure A4.** Residual turbidity of (a) single PACl addition at various doses followed by addition of NPAM after 2.5 min, and (b) two PACl doses combined with NPAM addition at different intervals. The pH was of 7.5.

**Figure A1.** Effect of addition ratio (first and second dose of the same coagulant), totaling 0.10 mM of either PACI or AS, on residual turbidity at pH=7.5. The time interval between the two doses was 2.5 min. Residual turbidity was determined while omitting flock breakage at 300 rpm.

**Figure A2.** Effect of solution pH on zeta potential with a single addition of the indicated dose of PACl or AS. The zeta potentials were measured 1 min after the addition.

**Figure A3.** Effect of solution pH on residual aluminum of the two coagulants added in the two addition modes. For two-stage addition, 0.10 mM PACl or AS was divided into two doses at a ratio of 3:7, and the addition interval was 2.5 min.

**Fig A4.** Residual turbidity of (a) single PACl addition at various doses followed by addition of NPAM after 2.5 min, and (b) two PACl doses combined with NPAM addition at different intervals. The pH was of 7.5.
